# Supplementary material for: Formation of hydrocarbons and carbon oxides in MXene reactions with water under varying oxidative conditions
Source: Royal Society of Chemistry journal article supplement (doi:10.1039/d4nr04937c), 2025-01-01
Supplement: d4nr04937c1.pdf [file d4nr04937c1.pdf]

## Supporting Information

### Formation of Hydrocarbons and Carbon Oxides in MXene Reactions with Water under Varying Oxidative Conditions

Shuohan Huang<sup>†,\*</sup>, Guanglei Xiang<sup>†</sup>, Vadym N. Mochalin<sup>‡,§,\*</sup>

<sup>†</sup>State Key Laboratory of Advanced Fiber Materials, College of Materials Science and Engineering, Donghua University, Shanghai 201620, China

<sup>‡</sup>Department of Chemistry, Missouri University of Science & Technology, Rolla, MO 65409, USA

<sup>§</sup>Department of Materials Science & Engineering, Missouri University of Science & Technology, Rolla, MO 65409, USA

\*Corresponding Author: huangs@dhu.edu.cn, mochalinv@mst.edu

ORCID:

Vadym N. Mochalin: 0000-0001-7403-1043

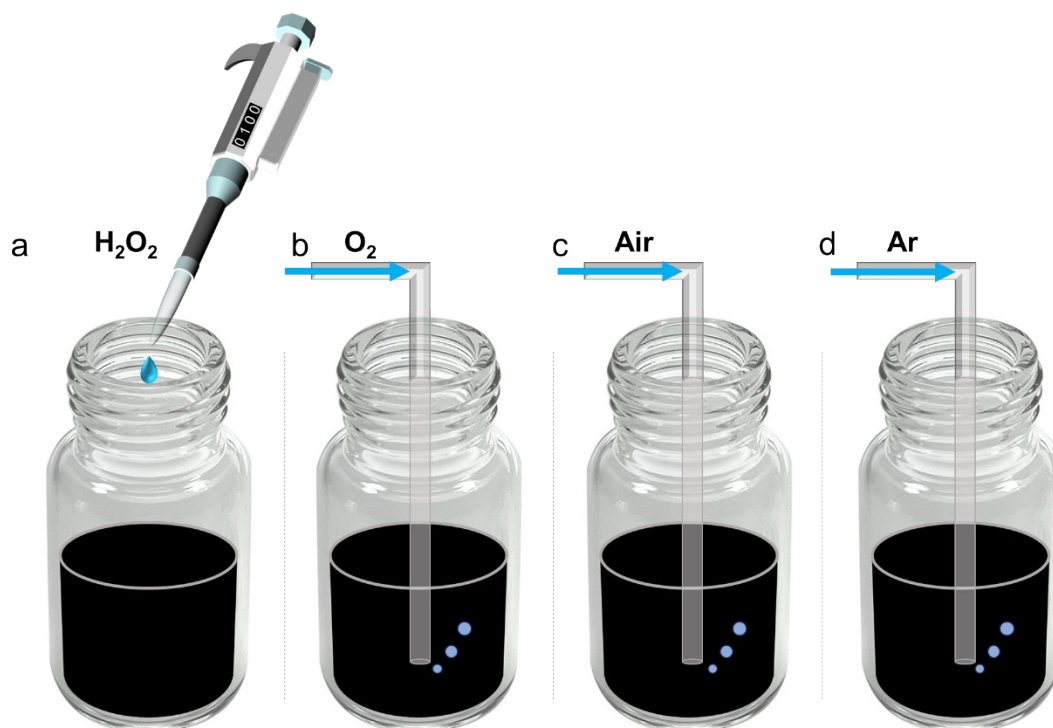

Figure S1. Preparation for MXene degradation samples under (a) H<sub>2</sub>O<sub>2</sub>, (b) O<sub>2</sub>, (c) air, and (d) Ar. The samples were sealed immediately after purging.

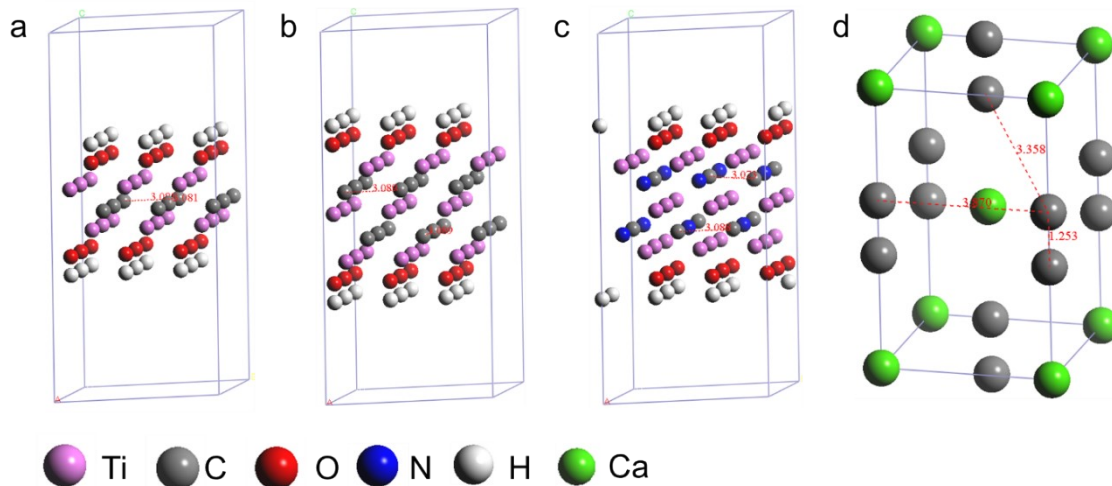

Figure S2. DFT optimized atomistic models of monolayer (a)  $\text{Ti}_2\text{C}(\text{OH})_2$ , (b)  $\text{Ti}_3\text{C}_2(\text{OH})_2$ , (c)  $\text{Ti}_3\text{CN}(\text{OH})_2$ , and (d)  $\text{CaC}_2$ .

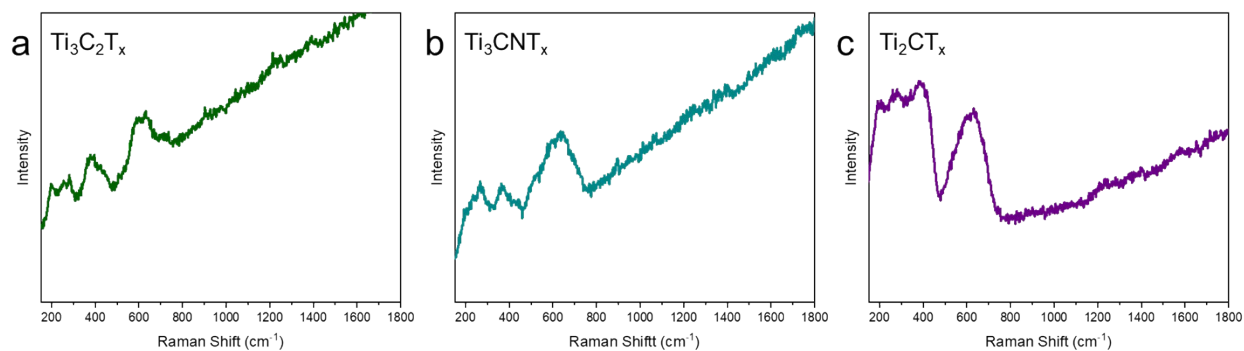

Figure S3. Raman spectra of (a)  $\text{Ti}_3\text{C}_2\text{T}_x$ , (b)  $\text{Ti}_3\text{CNT}_x$ , and (c)  $\text{Ti}_2\text{CT}_x$  MXenes recorded in an extended range of frequencies to show region of carbon Raman peaks.

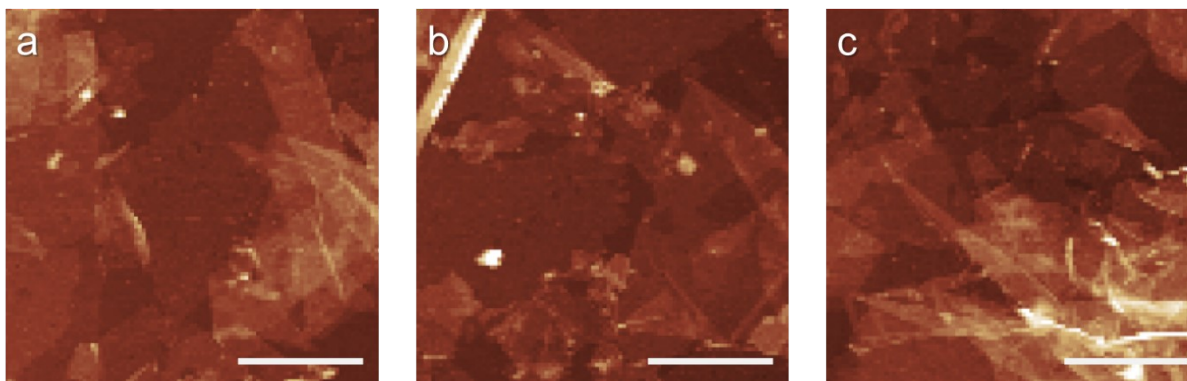

Figure S4. AFM images of (a)  $\text{Ti}_3\text{C}_2\text{T}_x$ , (b)  $\text{Ti}_3\text{CNT}_x$ , and (c)  $\text{Ti}_2\text{CT}_x$  MXenes. Scale bars are 1  $\mu\text{m}$ .

Table S1. Gas composition produced from MXenes under various environmental conditions.

| Ti <sub>2</sub> CT <sub>x</sub> | Gas                           | mol. % | SD   | Ti <sub>3</sub> CNT <sub>x</sub> | Gas                           | mol. % | SD   | Ti <sub>3</sub> C <sub>2</sub> T <sub>x</sub> | Gas                           | mol. % | SD    |
|---------------------------------|-------------------------------|--------|------|----------------------------------|-------------------------------|--------|------|-----------------------------------------------|-------------------------------|--------|-------|
| H <sub>2</sub> O <sub>2</sub>   | CH <sub>4</sub>               | 75.72  | 2.72 | H <sub>2</sub> O <sub>2</sub>    | CH <sub>4</sub>               | 33.38  | 2.41 | H <sub>2</sub> O <sub>2</sub>                 | CH <sub>4</sub>               | 54.33  | 11.41 |
|                                 | C <sub>2</sub> H <sub>2</sub> | 1.92   | 0.14 |                                  | C <sub>2</sub> H <sub>2</sub> | 0.90   | 0.13 |                                               | C <sub>2</sub> H <sub>2</sub> | 0.17   | 0.03  |
|                                 | C <sub>2</sub> H <sub>4</sub> | 2.73   | 0.09 |                                  | C <sub>2</sub> H <sub>4</sub> | 1.13   | 0.10 |                                               | C <sub>2</sub> H <sub>4</sub> | 1.84   | 0.21  |
|                                 | C <sub>2</sub> H <sub>6</sub> | 0.76   | 0.04 |                                  | C <sub>2</sub> H <sub>6</sub> | 0.11   | 0.02 |                                               | C <sub>2</sub> H <sub>6</sub> | 0.20   | 0.05  |
|                                 | CO                            | 13.26  | 2.72 |                                  | CO                            | 41.87  | 4.77 |                                               | CO                            | 31.32  | 7.58  |
|                                 | CO <sub>2</sub>               | 5.61   | 0.87 |                                  | CO <sub>2</sub>               | 22.61  | 6.24 |                                               | CO <sub>2</sub>               | 12.14  | 4.31  |
| O <sub>2</sub>                  | CH <sub>4</sub>               | 97.86  | 0.22 | O <sub>2</sub>                   | CH <sub>4</sub>               | 90.84  | 0.54 | O <sub>2</sub>                                | CH <sub>4</sub>               | 88.51  | 1.29  |
|                                 | C <sub>2</sub> H <sub>2</sub> | 0.00   | 0.00 |                                  | C <sub>2</sub> H <sub>2</sub> | 0.24   | 0.03 |                                               | C <sub>2</sub> H <sub>2</sub> | 0.12   | 0.03  |
|                                 | C <sub>2</sub> H <sub>4</sub> | 0.10   | 0.05 |                                  | C <sub>2</sub> H <sub>4</sub> | 2.64   | 0.16 |                                               | C <sub>2</sub> H <sub>4</sub> | 3.48   | 0.21  |
|                                 | C <sub>2</sub> H <sub>6</sub> | 0.48   | 0.05 |                                  | C <sub>2</sub> H <sub>6</sub> | 0.49   | 0.01 |                                               | C <sub>2</sub> H <sub>6</sub> | 0.34   | 0.02  |
|                                 | CO                            | 0.00   | 0.00 |                                  | CO                            | 3.49   | 0.87 |                                               | CO                            | 5.60   | 0.96  |
|                                 | CO <sub>2</sub>               | 1.56   | 0.20 |                                  | CO <sub>2</sub>               | 2.30   | 0.21 |                                               | CO <sub>2</sub>               | 1.95   | 0.14  |
| Air                             | CH <sub>4</sub>               | 98.94  | 0.14 | Air                              | CH <sub>4</sub>               | 95.32  | 0.45 | Air                                           | CH <sub>4</sub>               | 91.09  | 0.83  |
|                                 | C <sub>2</sub> H <sub>2</sub> | 0.00   | 0.00 |                                  | C <sub>2</sub> H <sub>2</sub> | 0.11   | 0.01 |                                               | C <sub>2</sub> H <sub>2</sub> | 0.15   | 0.01  |
|                                 | C <sub>2</sub> H <sub>4</sub> | 0.03   | 0.00 |                                  | C <sub>2</sub> H <sub>4</sub> | 1.87   | 0.19 |                                               | C <sub>2</sub> H <sub>4</sub> | 3.93   | 0.26  |
|                                 | C <sub>2</sub> H <sub>6</sub> | 0.29   | 0.02 |                                  | C <sub>2</sub> H <sub>6</sub> | 0.55   | 0.03 |                                               | C <sub>2</sub> H <sub>6</sub> | 0.37   | 0.01  |
|                                 | CO                            | 0.00   | 0.00 |                                  | CO                            | 1.15   | 0.47 |                                               | CO                            | 3.48   | 0.66  |
|                                 | CO <sub>2</sub>               | 0.74   | 0.13 |                                  | CO <sub>2</sub>               | 1.00   | 0.11 |                                               | CO <sub>2</sub>               | 0.98   | 0.04  |
| Ar                              | CH <sub>4</sub>               | 99.48  | 0.11 | Ar                               | CH <sub>4</sub>               | 96.75  | 0.36 | Ar                                            | CH <sub>4</sub>               | 93.44  | 1.27  |
|                                 | C <sub>2</sub> H <sub>2</sub> | 0.00   | 0.00 |                                  | C <sub>2</sub> H <sub>2</sub> | 0.20   | 0.04 |                                               | C <sub>2</sub> H <sub>2</sub> | 0.19   | 0.05  |
|                                 | C <sub>2</sub> H <sub>4</sub> | 0.03   | 0.01 |                                  | C <sub>2</sub> H <sub>4</sub> | 1.58   | 0.22 |                                               | C <sub>2</sub> H <sub>4</sub> | 3.84   | 0.71  |
|                                 | C <sub>2</sub> H <sub>6</sub> | 0.15   | 0.03 |                                  | C <sub>2</sub> H <sub>6</sub> | 0.39   | 0.06 |                                               | C <sub>2</sub> H <sub>6</sub> | 0.39   | 0.04  |
|                                 | CO                            | 0.00   | 0.00 |                                  | CO                            | 0.00   | 0.00 |                                               | CO                            | 0.82   | 0.82  |
|                                 | CO <sub>2</sub>               | 0.34   | 0.12 |                                  | CO <sub>2</sub>               | 1.08   | 0.14 |                                               | CO <sub>2</sub>               | 1.32   | 0.48  |
